# Supplementary material
Source: Elsevier journal article supplement (https://www.sciencedirect.com/science/article/pii/S0034935621002607)
Supplement: mmc1 [file S0034935621002607:mmc1.docx]

**Anexo 2. Documento de información para el estudio, mediante pruebas cutáneas y de laboratorio, de la alergia a fármacos y/o otras sustancias.**

**1. DOCUMENTO DE INFORMACIÓN PARA LAS PRUEBAS DE EXPOSICIÓN CONTROLADA A MEDICAMENTOS.**

Este documento sirve para que usted, o quien le represente, de su consentimiento para la realización de las pruebas. Eso significa que nos autoriza a realizarlas.

Puede usted retirar este consentimiento cuando lo desee. Firmado no le obliga a usted a hacerse las pruebas. De su rechazo no se derivará ninguna consecuencia adversa respecto a la atención recibida. Antes de firmar es necesario que lea despacio la información siguiente. Si tras la lectura, tiene alguna duda o necesita más información con mucho gusto le atenderemos.

- 1. **LO QUE USTED DEBE SABER:**
- **¿En que consiste y para qué sirve?**

Consiste en administrarle en el brazo y/o la espalda pequeñas dosis del medicamento que queremos probar.

Sirve para saber si es usted alérgico a ese medicamento

- **¿Cómo se realiza?**

La prueba se realiza en el brazo y/o espalda mediante inyección a nivel de la piel de una pequeña cantidad del medicamento sospechoso de haber causado la alergia. Si la prueba de piel es normal, se le administra el medicamento a distintas concentraciones mediante una inyeción intradérmica, con agujas de bajo calibre.

En todo momento estará controlado por un equipo entrenado y con experiencia.

Normalmente la prueba dura varias horas.

- **¿Qué efectos producirá?**

Es una técnica poco molesta. Puede presentar enrojecimiento y picor o escozor, en alguno de los puntos de punción.

- **En que se beneficiará**

Sabrá si tiene alergia al medicamento que se ha probado.

- **Otras alternativas disponibles en su caso**

Depende de cada caso en particular: puede continuar con los medicamentos que estaba tomando y tolerando hasta ahora y evitar los dudosos o los sospechosos de alergia en su caso.

- 1. **QUE RIESGOS TIENE**

Cualquier actuación médica tiene riesgos. La mayor parte de las veces los riesgos no se materializar y la intervención no produce daños o efectos secundarios indeseables. Pero a veces no es así. Por eso es importante que usted conozca los riesgos que pueden aparecer en este estudio.

- **LOS MAS FRECUENTES. En general son problemas leves**

Molestias locales en el lugar de la punción (escozor o picor). Desapareen en pocas horas.

Mareo. Suele darse en algunas personas en ciertas situaciones (análisis, visión de sangre, dolor, etc). Produce sensación de calor, sudor y desvanecimiento. Debe avisarnos si nota estos síntomas. No es grave y desaparece con medicación. No es una reacción alérgica.

Erupciones en la piel. Con alguna frecuencia aparecen picores con enrojecimiento de la piel o ronchas que desaparecen al suspender momentáneamente la prueba y adinistrarle medicación para ello.

- **LOS MAS GRAVES. En general, son muy poco frecuentes**

Respiratorios. Afonía, pitos en el pecho y sensación de asfixia. Se suspenderá la prueba y le administraremos tratamiento.

Digestivas. Dolor abdominal, náuseas, vómitos o diarrea. Se suspenderá la prueba y le administraremos tratamiento.

Muy rara vez. Puede producirse mareo, bajada de tensión, convulsiones e incluso parada cardio-respiratoria. En este caso se realizarán las medidas de reanimación. Es grave, pero generalmente reversible, aunque de forma muy excepcional puede provocar la muerte.

- **LOS DERIVADOS DE SUS PROBLEMAS DE SALUD**

**..............................................................................................................................................................................................................................................................**

**1.3. SITUACIONES ESPECIALES QUE DEBEN SER TENIDAS EN CUENTA.** Debe comunicarnos si ha tomado o tstá tomando alguna medicación o si existe posibilidad de embarazo. Si padece en la actualidad alguna enfermedad que no nos haya dicho, si toma usted anticoagulantes, padece arritmias cardíacas o si ha tenido un infarto de miocardio reciente o ha estado ingresada/o en un hospital recientemente.

**1.4. OTRAS CUESTIONES PARA LAS QUE LE PEDIMOS SU CONSENTIMIENTO.**

A veces es necesario tomar muestras biológicas para estudiar mejor su caso. Pueden ser conservadas y utilizadas posteriormente para realizar investigaciones relacioadas con la enfermedad que usted padece. No se usarán para fines comerciales. Si no da el consentimiento para ser utilizadas en investigación, las muestras se destruirán una vez dejen de ser útiles para documentar su caso. En cualquier caso, se protegerá adecuadamente la confidencialidad en todo momento.

También puede hacer falta tomar imágenes, como fotos o videos. Sirven para documentar mejor el caso. También puede usarse para fines docentes de difusión del conocimiento científico. En cualquier caso serán usadas si usted da su autorización. Su identidad siempre será preservada de forma confidencial.
