# Supplementary material
Source: Elsevier journal article supplement (https://www.sciencedirect.com/science/article/pii/S0034935621002607)
Supplement: mmc2 [file S0034935621002607:mmc2.docx]

**Anexo 3. Consentimiento informado**

**1. TITULO DEL ESTUDIO.** “Epidemiología de las reacciones de anafilaxia perioperatorias”.

2. Apellidos y nombre del paciente.............................................................................

3. Profesional que informa e interviene en el consentimiento informado:

*APELLIDOS Y NOMBRE ........................................................ FECHA FIRMA*

4. CONSENTIMIENTO

Yo, D/Dña ...............................................................................DNI:.....................................

Manifiesto que estoy conforme con el estudio que se me ha propuesto. He leído y comprendido la información anterior. He podido preguntar y aclarar mis dudas. Comprendo que mi participación es voluntaria y puedo retirarme del estudio cuando quiera, sin dar explicaciones y sin que ello repercuta en mi atención médica.

Doy libremente mi conformidad para participar en este estudio y mi consentimiento para el acceso y la utilización de mis datos en las condiciones detalladas en la hoja de información.

Acedo a que mis muestras biológicas obtenidas para el estudio puedan ser utilizadas en el futuro en nuevos estudios relacionados con la anafilaxia (alergia) a fármacos.

Si ⊡ NO ⊡

Fdo. El /la Paciente Fdo. El/la Investigador

En Barcelona, a de 20….
